# Supplementary material
Source: PubMed Central journal article supplement (PMC4537804)
Supplement: NIHMS684848-supplement.pdf [file NIHMS684848-supplement.pdf]

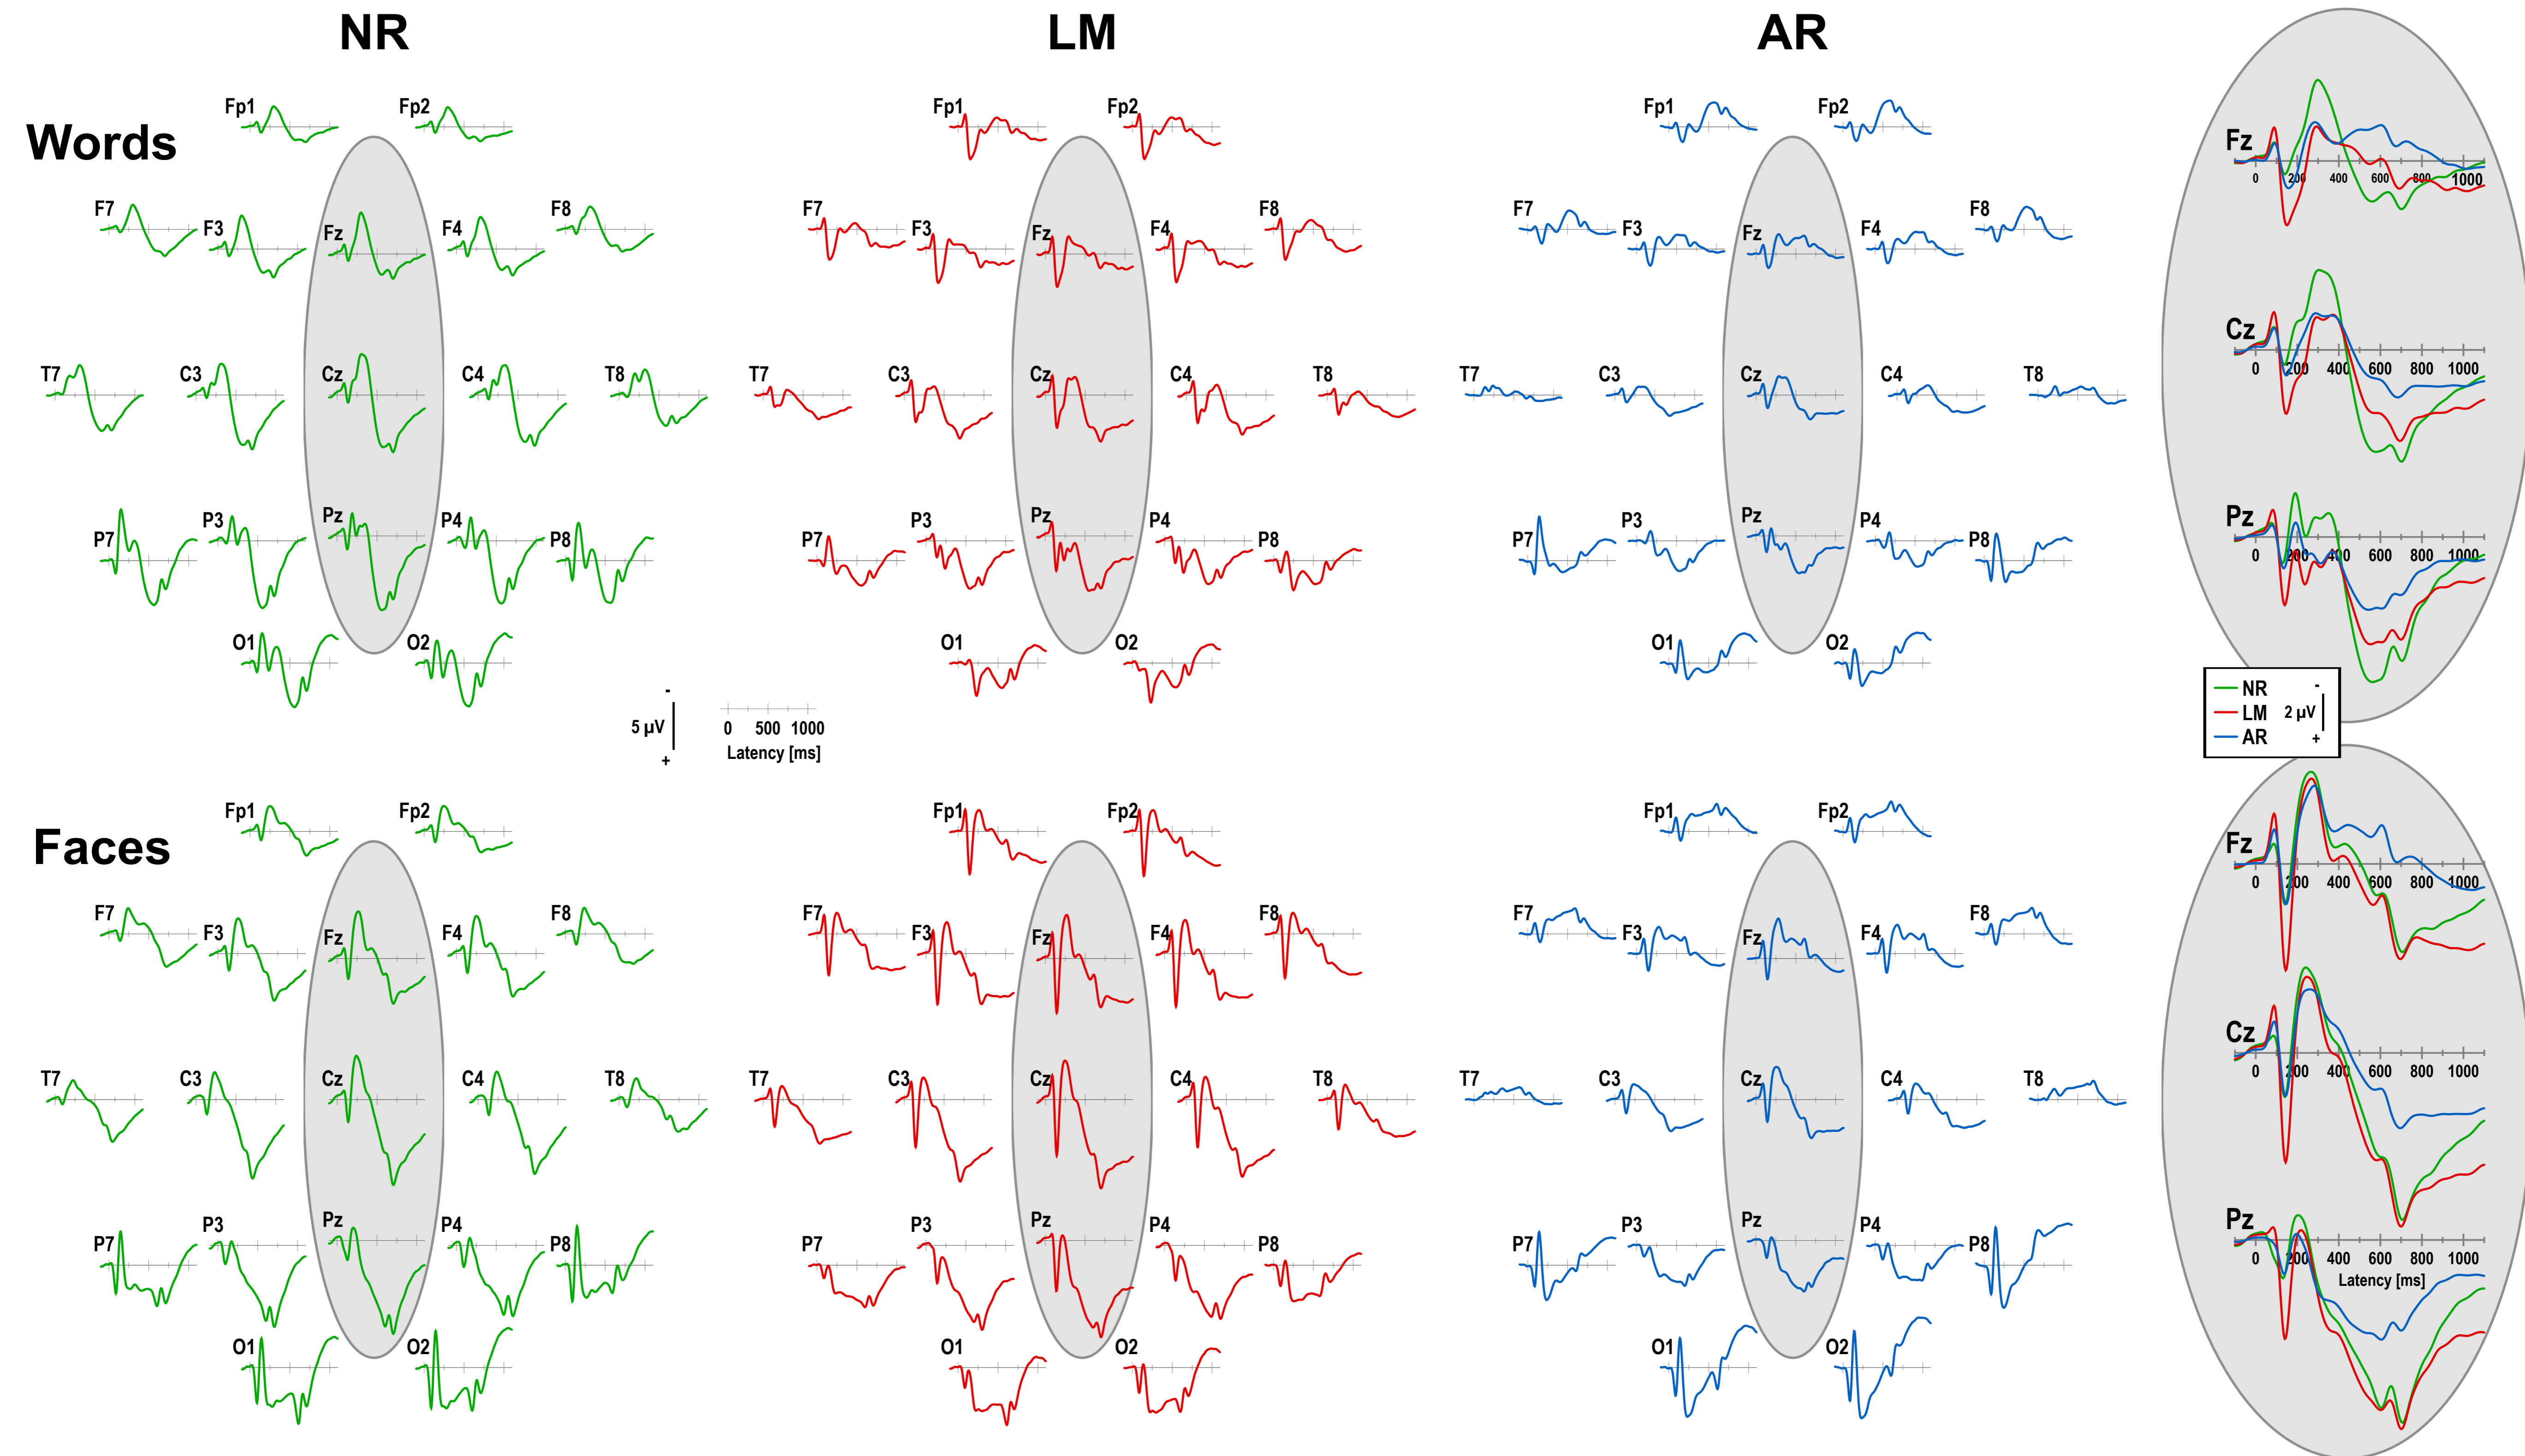

**Fig. S1.** Impact of the EEG reference (NR: nose reference; LM: linked-mastoids reference; AR: average reference) on grand mean ERPs [ $\mu\text{V}$ ] of words (top) or faces (bottom) at selected 19 locations of the 10-20 system (cf. Fig. 2). Enlargements shown on the right compare the three common reference schemes at midline sites.
